# Supplementary material for: A sex-biased imbalance between Tfr, Tph, and atypical B cells determines antibody responses in COVID-19 patients
Source: PubMed Central journal article supplement (PMC9942838; doi:10.1073/pnas.2217902120), 2023-01-20
Supplement: pnas.2217902120.sapp.pdf [file pnas.2217902120.sapp.pdf]

## Supporting Information for

### A sex-biased imbalance between Tfr, Tph and atypical B cells, determines antibody responses in COVID-19 patients

**Authors:** Jonas Nørskov Søndergaard<sup>1†</sup>, Janyerkye Tulyeu<sup>1†</sup>, Ryuya Edahiro<sup>2,3</sup>, Yuya Shirai<sup>2,3</sup>, Yuta Yamaguchi<sup>2,4</sup>, Teruaki Murakami<sup>2,4</sup>, Takayoshi Morita<sup>2,4</sup>, Yasuhiro Kato<sup>2,4</sup>, Haruhiko Hirata<sup>2</sup>, Yoshito Takeda<sup>2</sup>, Daisuke Okuzaki<sup>5,6,9,10</sup>, Shimon Sakaguchi<sup>7,8\*</sup>, Atsushi Kumanogoh<sup>2,4,9,10</sup>, Yukinori Okada<sup>3,9,10,11,12,13,14</sup>, James Badger Wing<sup>1,15\*</sup>

†Equal contribution

#### Affiliations:

<sup>1</sup>Human Immunology Team, Center for Infectious Disease Education and Research (CiDER), Osaka University, Suita, Japan

<sup>2</sup>Department of Respiratory Medicine and Clinical Immunology, Osaka University Graduate School of Medicine, Suita, Japan.

<sup>3</sup>Department of Statistical Genetics, Osaka University Graduate School of Medicine, Suita, Japan.

<sup>4</sup>Department of Immunopathology, Immunology Frontier Research Center (WPI-IFReC), Osaka University, Suita, Japan.

<sup>5</sup>Laboratory of Human Immunology (Single Cell Genomics), WPI-IFReC, Osaka University, Suita, Japan.

<sup>6</sup>Genome Information Research Center, Research Institute for Microbial Diseases, Osaka University, Suita, Japan

<sup>7</sup>Laboratory of Experimental Immunology, WPI-IFReC, Osaka University, Suita, Japan.

<sup>8</sup>Department of Experimental Pathology, Institute for Frontier Medical Sciences, Kyoto University, Kyoto, Japan.

<sup>9</sup>Integrated Frontier Research for Medical Science Division, Institute for Open and Transdisciplinary Research Initiatives (OTRI), Osaka University, Suita, Japan.

<sup>10</sup>CiDER, Osaka University, Suita, Japan.

<sup>11</sup>Laboratory of Statistical Immunology. WPI-IFReC, Osaka University, Suita, Japan.

<sup>12</sup>Integrated Frontier Research for Medical Science Division, Institute for Open and Transdisciplinary Research Initiatives, Osaka University, Suita, Japan.

<sup>13</sup>Laboratory for Systems Genetics, RIKEN Center for Integrative Medical Sciences, Yokohama, Japan.

<sup>14</sup>Department of Genome Informatics, Graduate School of Medicine, the University of Tokyo, Tokyo 113-0033, Japan.

<sup>15</sup>Laboratory of Human Single Cell Immunology, WPI-IFReC, Osaka University, Suita, Japan.

\*Shimon Sakaguchi and James Wing

**Email:** shimon@ifrec.osaka-u.ac.jp or jbwing@ifrec.osaka-u.ac.jp

**This PDF file includes:**

Figures S1 to S8  
Table S1

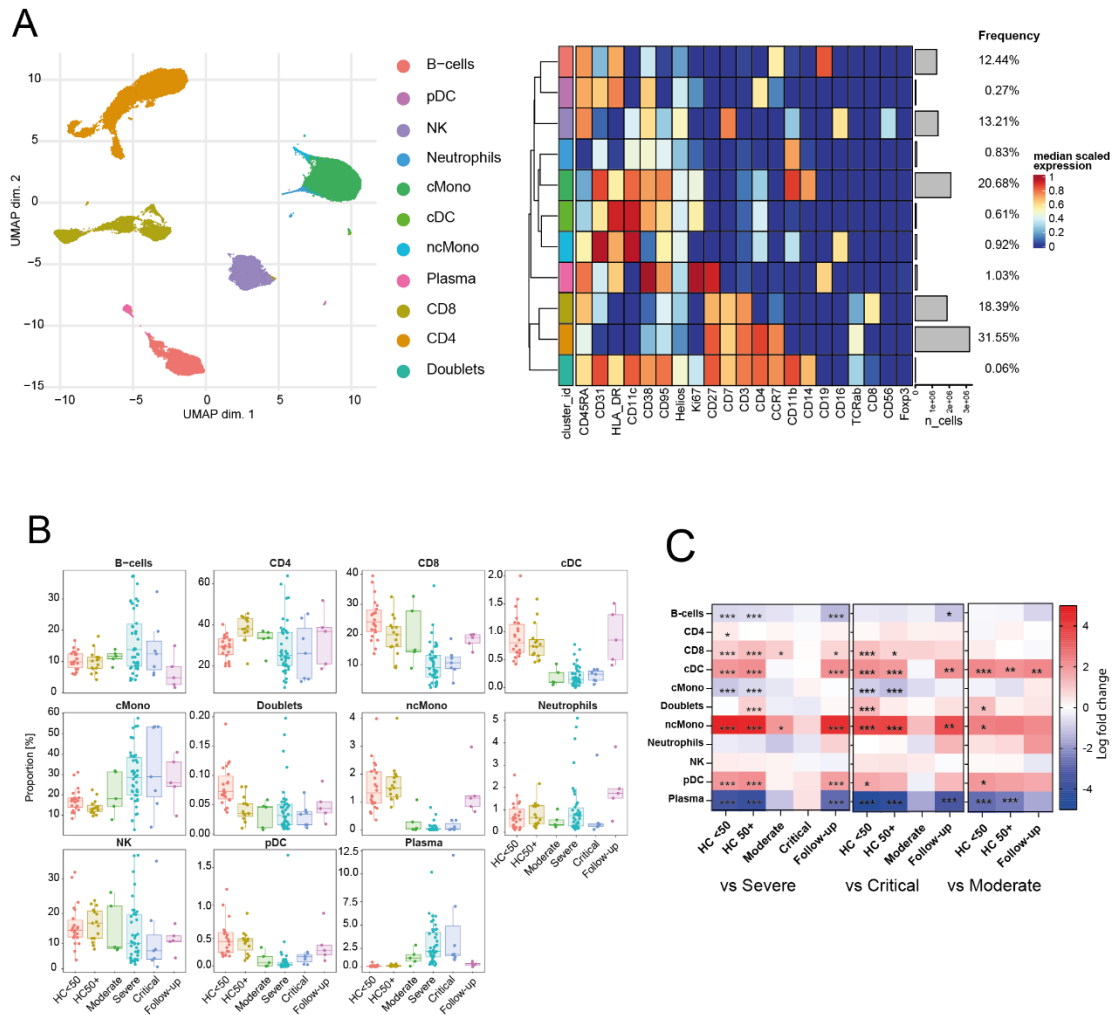

**Fig. S1. Alterations to frequency of CD45<sup>+</sup> cells.** **A)** UMAP and expression heatmap of FlowSOM clusters from 10,000,000 cells across 100 donors. **B)** Frequency boxplots of proportion of CD45<sup>+</sup> cell from indicated clusters. Healthy controls under 50 years of age (HC<50), healthy control of 50 or over (HC50+), moderate, severe, critical or follow-up COVID-19 patients. **C)** Comparison of the fold change (log<sub>2</sub>) in cluster-frequency between the indicated group and severe (left), critical (middle), and moderate (right) COVID-19 patients. \*p≤0.05, \*\*p≤0.01, \*\*\*p≤0.001 by edgeR.

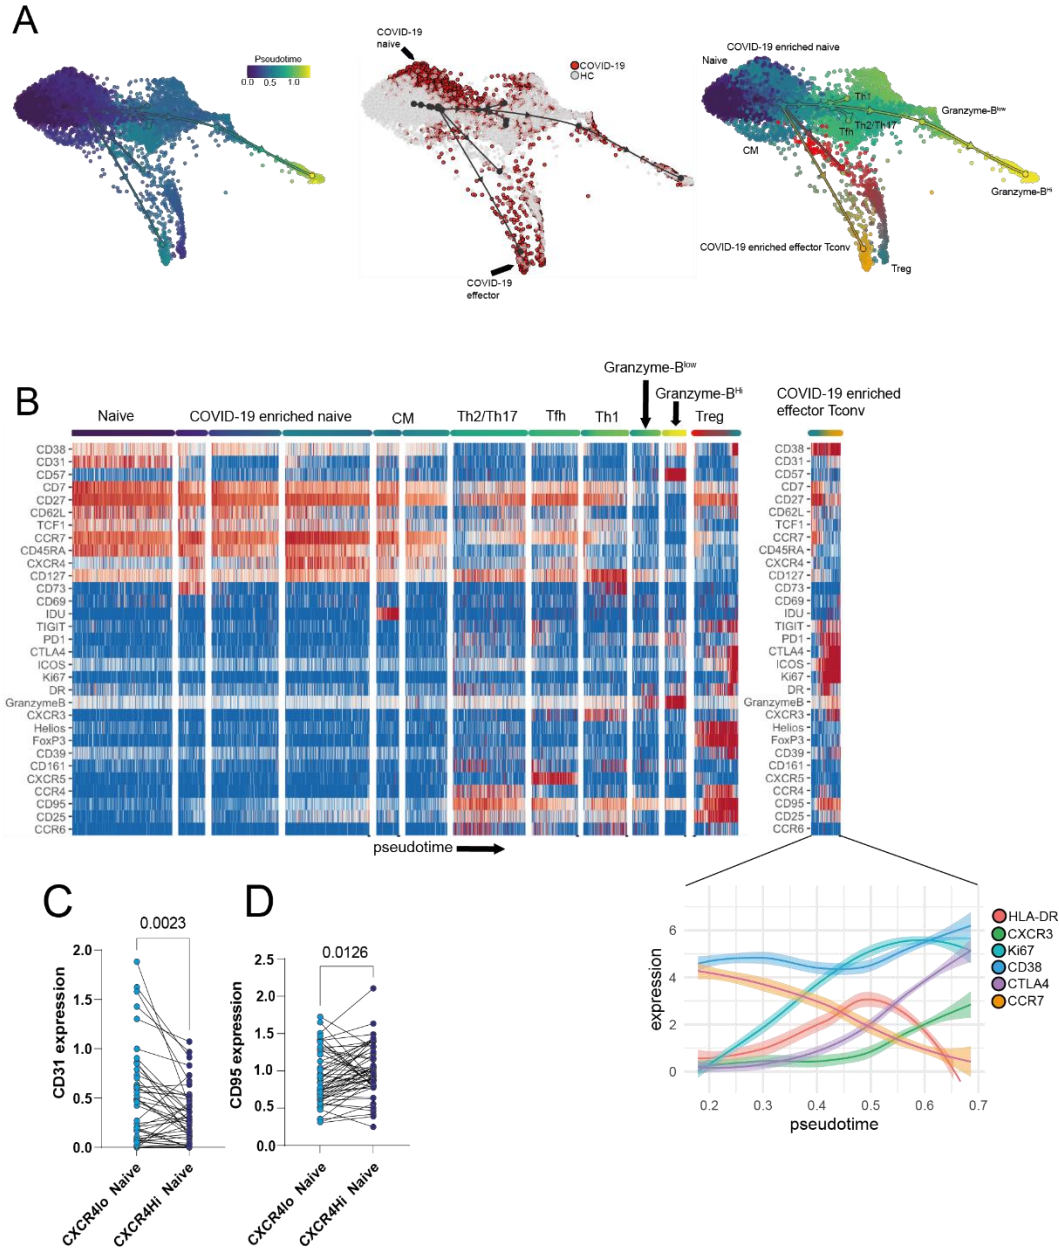

**Fig. S2. Trajectory analysis of CD4 T-cells in COVID-19.** **A)** Force-Atlas2 visualization of CD4 T-cell pseudo time (left) and identified milestones corresponding to specific T cell subsets (right). The middle figure indicates single cells originating from COVID-19 patients or healthy controls. **B)** Heatmap of marker expressions within milestones/subsets. **C)** CD31 expression within clusters CXCR4<sup>lo</sup> naïve and CXCR4<sup>hi</sup> naïve from Fig. 2A. **D)** CD95 expression within clusters CXCR4<sup>lo</sup> naïve and CXCR4<sup>hi</sup> naïve from Fig. 2A. Central memory (CM).

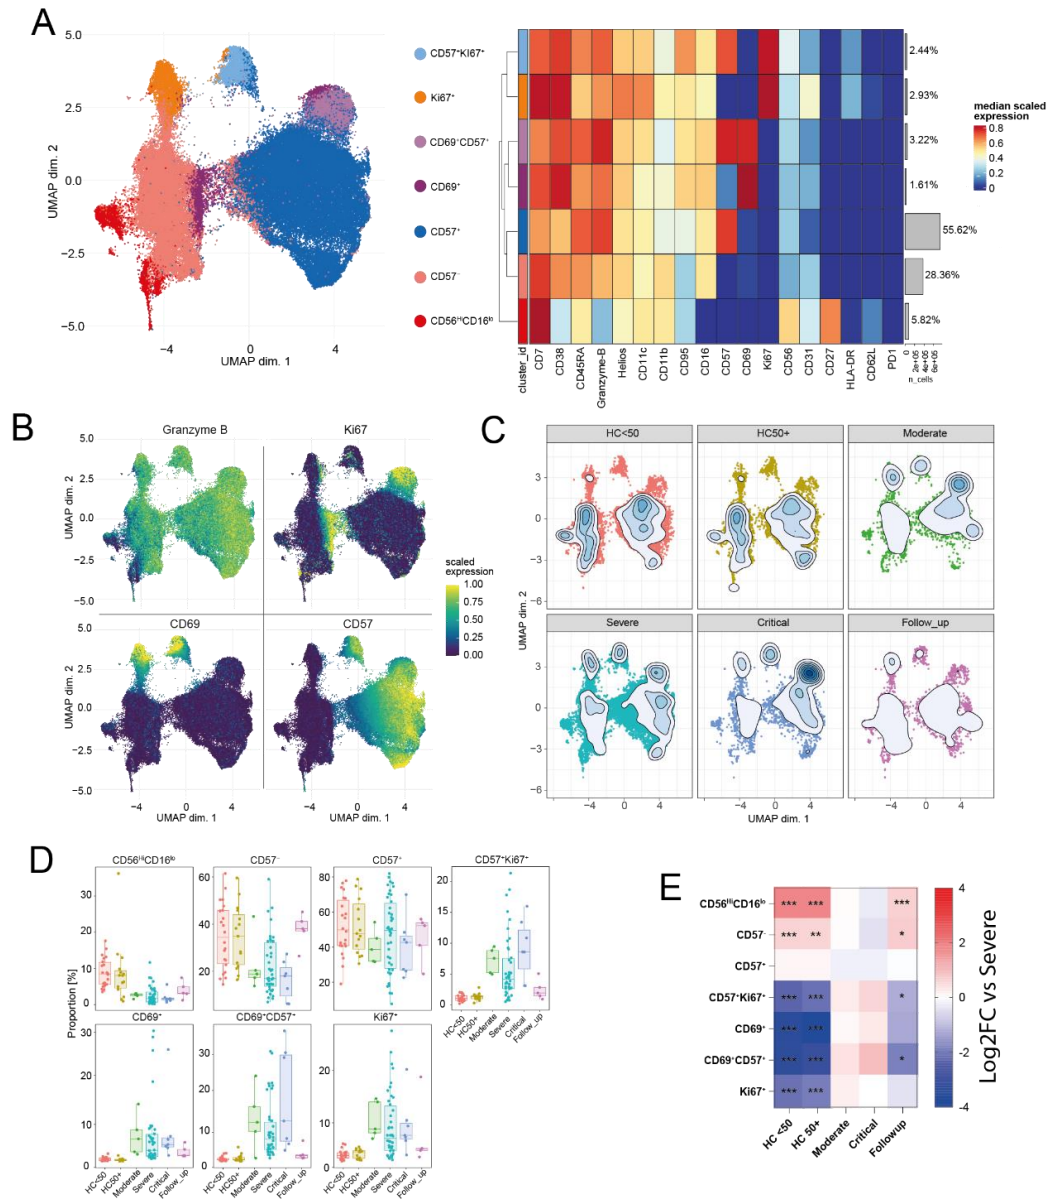

**Fig. S3. NK phenotypes in COVID-19.** **A)** UMAP and expression heatmaps of annotated FlowSOM clusters from NK cells (cluster NK from Fig. S1A). **B)** Scaled expression of indicated markers displayed on the UMAP. **C)** Population density of cells displayed on UMAP. **D)** Frequency boxplots of proportion within the NK cell cluster. Healthy controls under 50 years of age (HC<50), healthy control of 50 or over (HC50+), moderate, severe, critical or follow-up COVID-19 patients. **E)** Comparison of the fold change ( $\log_2$ ) in cluster-frequency between the indicated group and severe COVID-19 patients. \* $p \leq 0.05$ , \*\* $p \leq 0.01$ , \*\*\* $p \leq 0.001$  by edgeR.

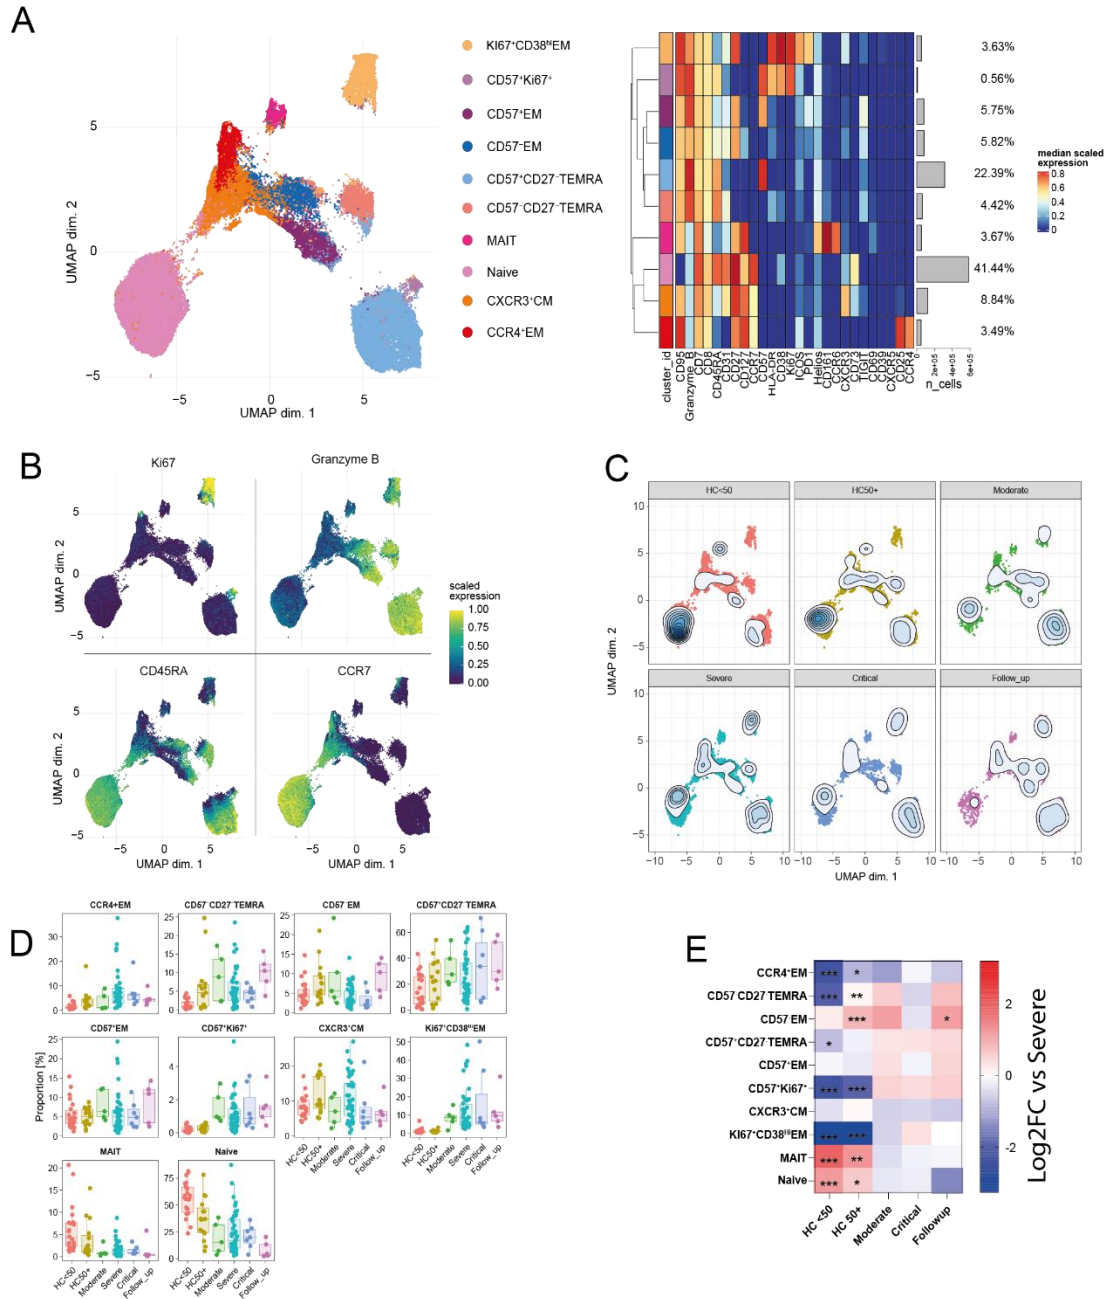

**Fig. S4. CD8 phenotypes in COVID-19.** **A)** UMAP and expression heatmaps of annotated FlowSOM clusters from CD8 cells (cluster CD8 from Fig. S1A). **B)** Scaled expression of indicated markers displayed on the UMAP. **C)** Population density of cells displayed on UMAP. **D)** Frequency boxplots of proportion within the CD8<sup>+</sup> T cells cluster. Healthy controls under 50 years of age (HC<50), healthy control of 50 or over (HC50+), moderate, severe, critical or follow-up COVID-19 patients. **E)** Comparison of the fold change (log<sub>2</sub>) in cluster-frequency between the indicated group and severe

COVID-19 patients. \* $p \leq 0.05$ , \*\* $p \leq 0.01$ , \*\*\* $p \leq 0.001$  by edgeR. Effector memory (EM), Central memory (CM), Terminal effector CD45RA positive (TEMRA), Mucosal associated invariant T (MAIT).



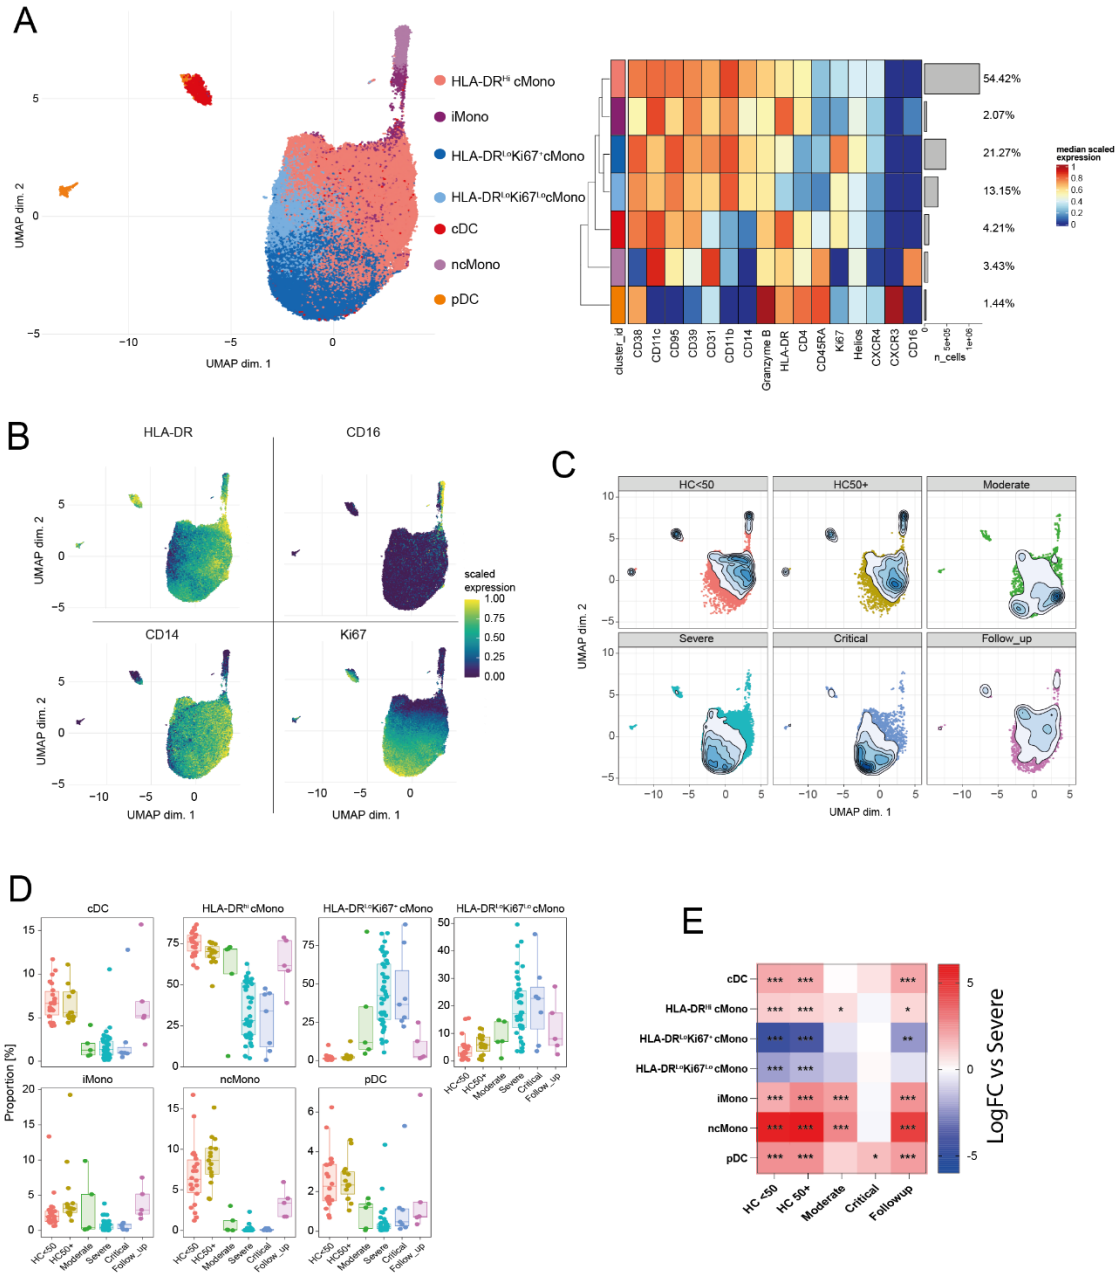

**Fig. S5. Myeloid cell and DC phenotypes in COVID-19.** **A)** UMAP and expression heatmaps of annotated FlowSOM clusters from myeloid cells and DCs (clusters cDC, pDC, cMono and ncMono from Fig. S1A) **B)** Scaled expression of indicated markers displayed on the UMAP. **C)** Population density of cells displayed on UMAP. **D)** Frequency boxplots of proportion within the myeloid and DC cluster. Healthy controls under 50 years of age (HC<50), healthy control of 50 or over (HC50+), moderate, severe, critical or follow-up COVID-19 patients. **E)** Comparison of the fold change ( $\log_2$ ) in



cluster-frequency between the indicated group and severe COVID-19 patients. \* $p \leq 0.05$ , \*\* $p \leq 0.01$ , \*\*\* $p \leq 0.001$  by edgeR.

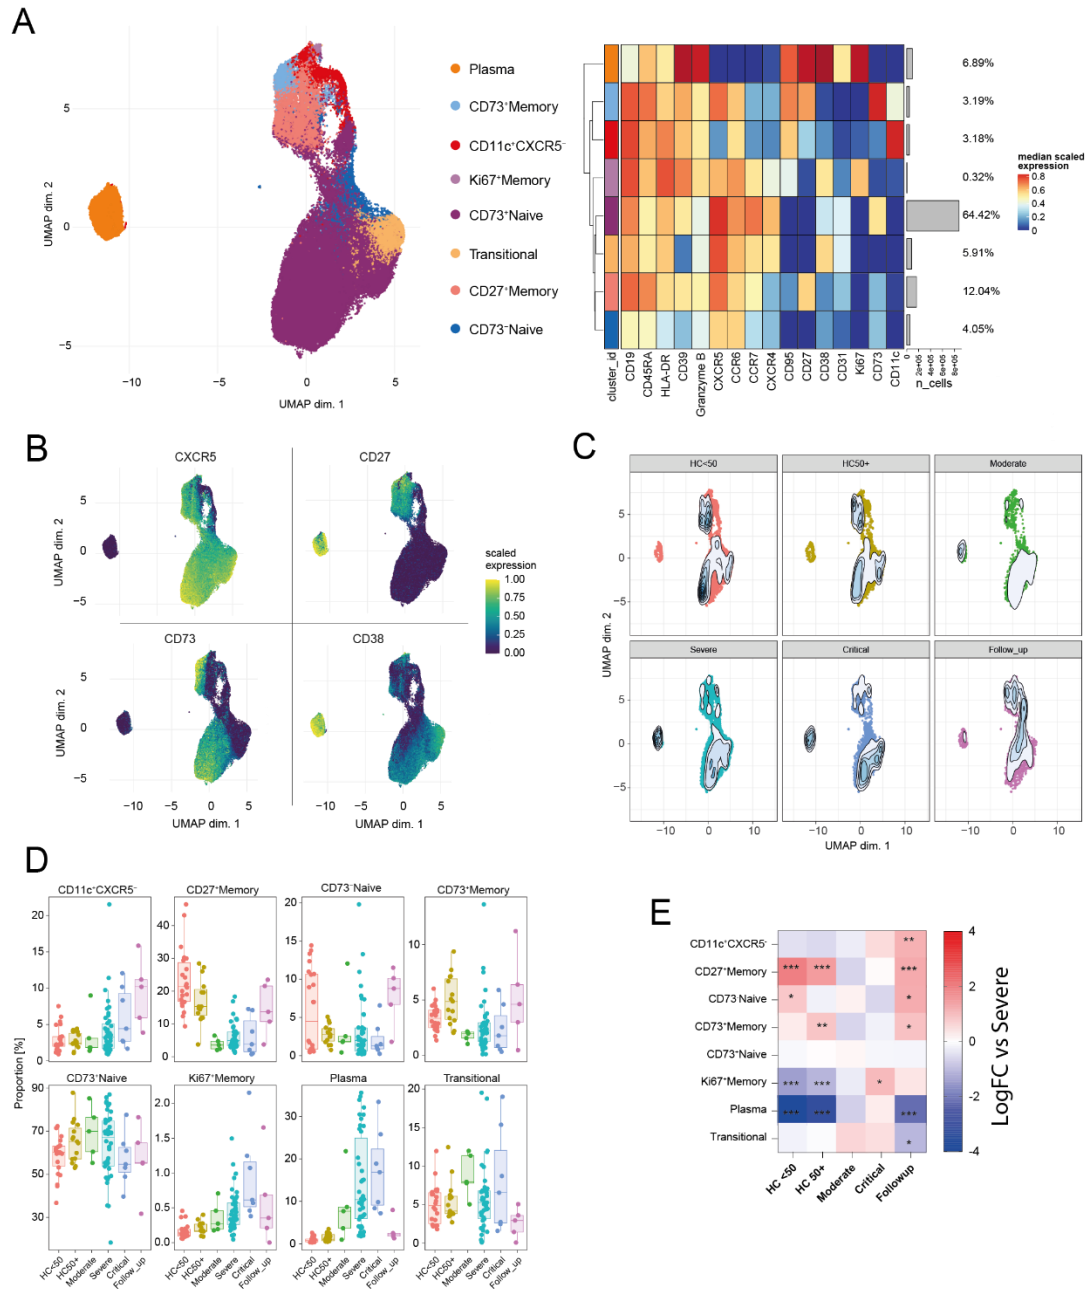

**Fig. S6. B-cell and plasma cell phenotypes in COVID-19.** **A)** UMAP and expression heatmaps of annotated FlowSOM clusters from B and plasma cells (clusters “B-cells” and “plasma cells” from Fig. S1A). **B)** Scaled expression of indicated markers displayed on the UMAP. **C)** Population density of cells displayed on UMAP. **D)** Frequency boxplots of proportion within the indicated clusters. Healthy controls under 50 years of age (HC<50), healthy control of 50 or over (HC50+), moderate, severe, critical or follow-

up COVID-19 patients. **E)** Comparison of the fold change ( $\log_2$ ) in cluster-frequency between the indicated group and severe COVID-19 patients. \* $p \leq 0.05$ , \*\* $p \leq 0.01$ , \*\*\* $p \leq 0.001$  by edgeR.

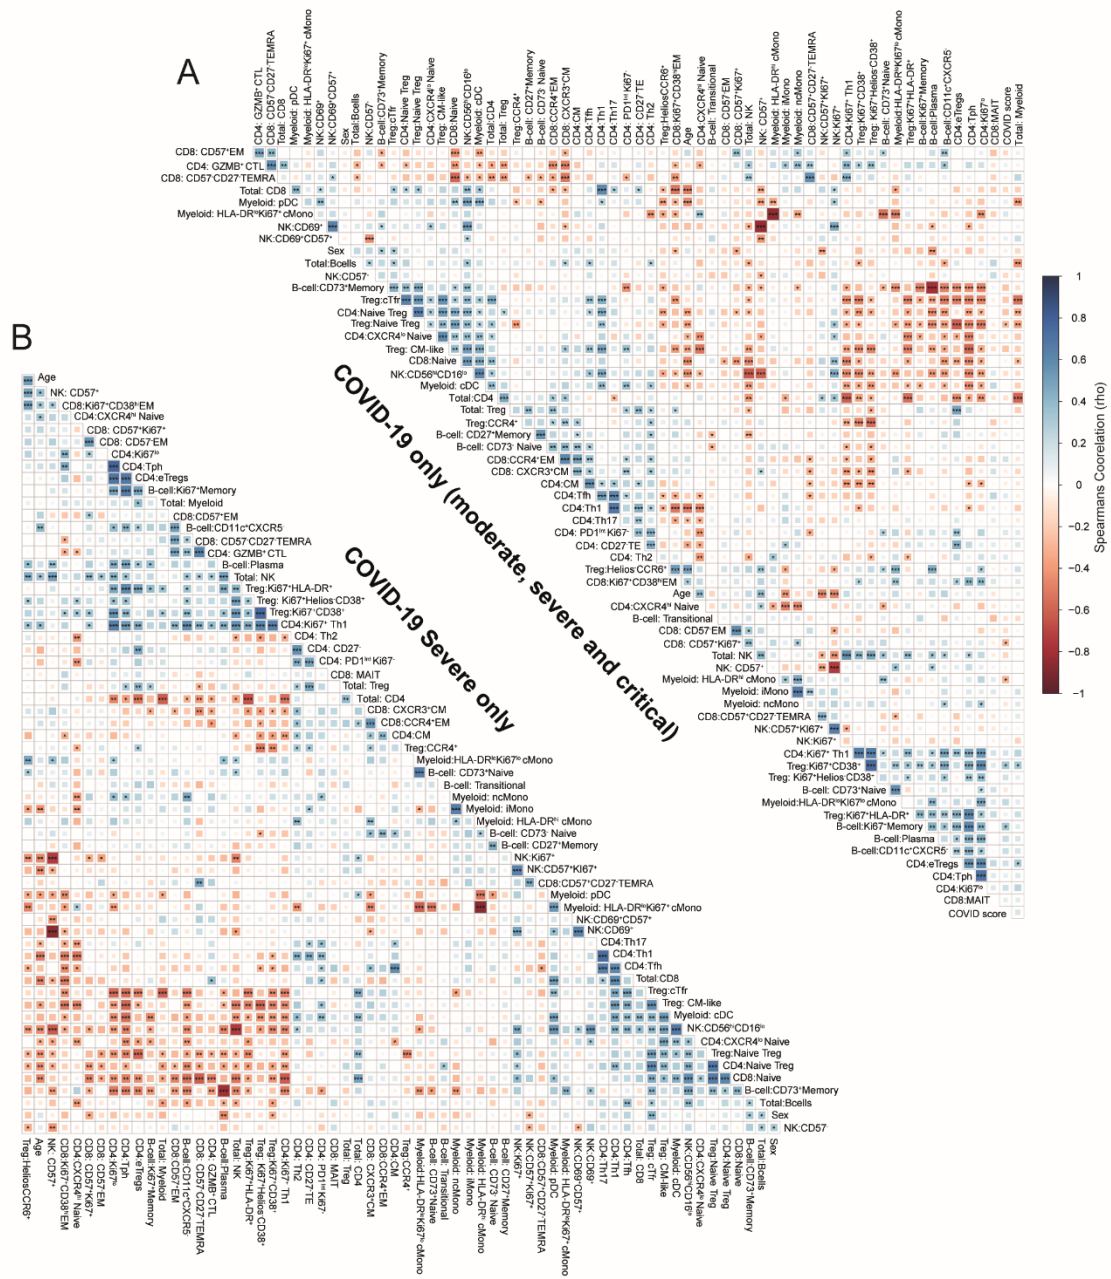

**Fig. S7. Cellular correlations in patient subgroups.** **A)** Spearman correlations matrix of subset frequencies from moderate, severe, and critical patient groups with severity of infection scored as WHO ordinal scale (4 = moderate, 6= severe, 7 = Critical) and sex (1 = male, 2= female). **B)** Spearman correlations matrix of subset frequencies from severe COVID-19 patients with severity of infection scored as WHO ordinal scale (4 = moderate, 6= severe, 7 = Critical) and sex (1 = male, 2= female). Correlations by

spearman rank (A, B). Significance \* $p \leq 0.05$ , \*\* $p \leq 0.01$ , \*\*\* $p \leq 0.001$ . Effector memory (EM), Central memory (CM), Terminal effector CD45RA positive (TEMRA).

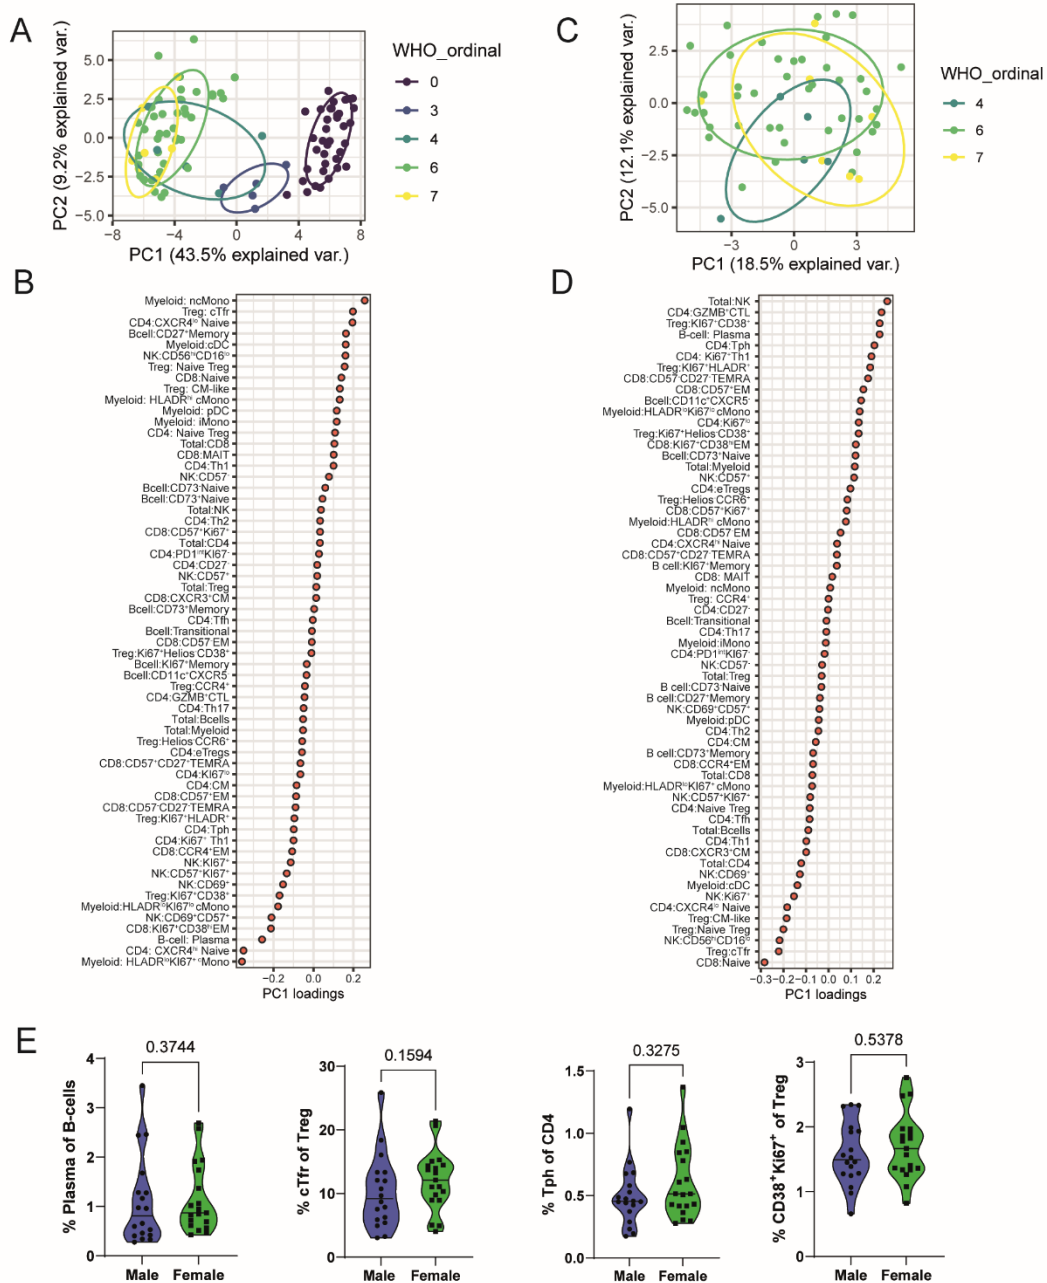

**Fig. S8. Principal component analysis and sex differences in healthy controls. A)** Factorial map of the principal component (PC) analysis separates log2 normalized cellular fractions of patients classified into WHO ordinal categories of COVID severity. 0 = Healthy donor; 3 = follow-up; 4 = moderate, 6 = severe, 7 = critical. The proportion of

variance explained by each PC is indicated in parenthesis. **B)** PC1 loadings for PCA in A). **C-D)** PCA analysis, but only using WHO ordinal category moderate, severe, and critical. **E)** Violin plots of sex specific differences of indicated cellular populations in healthy controls. Significance by Mann-Whitney test.

**Table S1. Mass cytometry staining panel**

| <b>Table S1A:<br/>Barcodes</b>      |                       |                             |                     |              |
|-------------------------------------|-----------------------|-----------------------------|---------------------|--------------|
| <b>Label</b>                        | <b>Target</b>         | <b>Clone (Product name)</b> | <b>Manufacturer</b> | <b>Titre</b> |
| 113In                               | CD45                  | HI30                        | Biolegend           | 100          |
| 115In                               | CD45                  | HI30                        | Biolegend           | 100          |
| 194Pt                               | CD45                  | HI30                        | Biolegend           | 100          |
| 195Pt                               | CD45                  | HI30                        | Biolegend           | 100          |
| 196Pt                               | CD45                  | HI30                        | Biolegend           | 100          |
| 198Pt                               | CD45                  | HI30                        | Biolegend           | 100          |
|                                     | Fc receptors          | (Human TruStain FcX)        | Biolegend           | 50           |
| Biotin                              | CXCR5                 | RF8B2                       | BD                  | 25           |
|                                     |                       |                             |                     |              |
| <b>Table S1B:<br/>Surface stain</b> |                       |                             |                     |              |
| <b>Label</b>                        | <b>Target</b>         | <b>Clone (Product name)</b> | <b>Manufacturer</b> | <b>Titre</b> |
| 110Cd                               | CD3                   | UCHT1                       | Biolegend           | 50           |
| 111Cd                               | CD4                   | RPA-T4                      | Biolegend           | 100          |
| 112Cd                               | CD8                   | RPA-T8                      | Biolegend           | 50           |
| 114Cd                               | CD14                  | M5E2                        | Biolegend           | 100          |
| 127I                                | Active DNA production | (Cell-ID IdU)               | Fluidigm            | 1000         |
| 141Pr                               | CCR6                  | G034E3                      | Fluidigm            | 50           |
| 144Nd                               | CD7                   | 6B7                         | Biolegend           | 100          |
| 145Nd                               | CD56                  | HCD56                       | Biolegend           | 50           |
| 147Sm                               | CD62L                 | DREG-56                     | Biolegend           | 200          |
| 148Nd                               | CD161                 | HP-3G10                     | Biolegend           | 100          |
| 149Sm                               | CCR4                  | L291H4                      | Fluidigm            | 400          |
| 151Eu                               | ICOS                  | C398.4A                     | eBioscience         | 100          |
| 152Sm                               | CD69                  | FN50                        | Biolegend           | 100          |
| 153Eu                               | CD45RA                | HI100                       | Biolegend           | 100          |
| 154Sm                               | CD73                  | AD2                         | Biolegend           | 100          |
| 155Gd                               | CCR7                  | G043H7                      | Biolegend           | 100          |
| 156Gd                               | CXCR4                 | 12G5                        | Biolegend           | 50           |
| 157Gd                               | CD16                  | 3G8                         | Biolegend           | 100          |
| 158Gd                               | CD27                  | L128                        | Fluidigm            | 200          |
| 159Tb                               | CD19                  | HIB19                       | Biolegend           | 200          |
| 160Gd                               | CD39                  | A1                          | Fluidigm            | 100          |
| 161Dy                               | CD11c                 | 3.9                         | Biolegend           | 100          |
| 163Dy                               | TCR $\alpha/\beta$    | IP26                        | Biolegend           | 100          |
| 164Dy                               | CD95                  | DX2                         | Fluidigm            | 100          |



|                                           |                      |                                                     |                     |              |
|-------------------------------------------|----------------------|-----------------------------------------------------|---------------------|--------------|
| 165Ho                                     | Biotin               | 1D4-C5                                              | Fluidigm            | 50           |
| 166Er                                     | PD1                  | EH12.2H7                                            | Biolegend           | 100          |
| 167Er                                     | CD31                 | WM59                                                | Biolegend           | 200          |
| 169Tm                                     | CD25                 | 2A3                                                 | Fluidigm            | 100          |
| 171Yb                                     | CD57                 | HCD57                                               | Biolegend           | 400          |
| 172Yb                                     | CD38                 | HIT2                                                | Fluidigm            | 100          |
| 173Yb                                     | TIGIT                | MBSA43                                              | eBioscience         | 100          |
| 174Yb                                     | HLA-DR               | L243                                                | Fluidigm            | 200          |
| 175Lu                                     | CXCR3                | G025H7                                              | Biolegend           | 100          |
| 176Yb                                     | CD127                | A019D5                                              | Fluidigm            | 100          |
| 209Bi                                     | CD11b                | ICRF44                                              | Fluidigm            | 100          |
|                                           |                      |                                                     |                     |              |
| <b>Table S1C:<br/>Viability stain</b>     |                      |                                                     |                     |              |
| <b>Label</b>                              | <b>Target</b>        | <b>Product name</b>                                 | <b>Manufacturer</b> | <b>Titre</b> |
| 104,<br>105,106,<br>108, 110Pd            | Dead cells           | (Ethylenediamine)palladium<br>(II) chloride >99.99% | Sigma               | 500<br>(1µM) |
|                                           |                      |                                                     |                     |              |
| <b>Table S1D:<br/>Intracellular stain</b> |                      |                                                     |                     |              |
| <b>Label</b>                              | <b>Target</b>        | <b>Clone</b>                                        | <b>Manufacturer</b> | <b>Titre</b> |
| 142Nd                                     | Cleaved<br>caspase 3 | D3E9                                                | Fluidigm            | 100          |
| 143Nd                                     | TCF1                 | 7F11A10                                             | Biolegend           | 50           |
| 146Nd                                     | Helios               | 22F6                                                | Biolegend           | 400          |
| 150Nd                                     | Granzyme B           | CLB-GB11                                            | Novus               | 100          |
| 162Dy                                     | Foxp3                | 236A/E7                                             | eBioscience         | 200          |
| 168Er                                     | Ki67                 | Ki-67                                               | Fluidigm            | 200          |
| 170Er                                     | CTLA-4               | 14D3                                                | Fluidigm            | 50           |
|                                           |                      |                                                     |                     |              |
| <b>Table S1E:<br/>DNA stain</b>           |                      |                                                     |                     |              |
| <b>Label</b>                              | <b>Target</b>        | <b>Product name</b>                                 | <b>Manufacturer</b> | <b>Titre</b> |
| 103Rh                                     | DNA                  | Cell-ID Intercalator-Rh—500<br>µM                   | Fluidigm            | 500<br>(1µM) |
